# Supplementary material for: Human Papillomavirus L2 Capsid Protein Stabilizes γ-Secretase during Viral Infection
Source: MDPI journal article supplement (doi:10.3390/v14040804), 2022-04-13
Supplement: s1 [file s1]

Supplementary Materials

# Human Papillomavirus L2 Capsid Protein Stabilizes $\gamma$ -Secretase during Viral Infection

Table S1. qRT-PCR for packaged reporter genomes.

| Virus    | Genomes/ $\mu$ L |
|----------|------------------|
| WT HPV16 | 7.11E+05         |
| Null     | 1.08E+06         |
| Notch    | 2.79E+05         |
| WT HPV16 | 3.73E+07         |
| BR6      | 2.00E+06         |
| BR11     | 1.85E+07         |
| WT HPV16 | 2.14E+07         |
| L46A     | 1.01E+07         |
| Q47L     | 2.43E+07         |
| Y48L     | 1.49E+07         |
| WT HPV16 | 1.28E+06         |
| G49L     | 1.79E+06         |
| S50L     | 2.54E+06         |
| M51L     | 5.75E+06         |

Table S2. List of antibodies used in this study.

| Antigen  | Source         | Catalogue Number | Dilution | Application |
|----------|----------------|------------------|----------|-------------|
| FLAG M2  | Sigma          | F3165            | 1:5000   | IP          |
| FLAG HRP | Sigma          | A8592            | 1:1000   | WB          |
| HPV16 L1 | BD Biosciences | 554171           | 1:1000   | WB          |
| PS1      | Cell Signaling | 5643S            | 1:1000   | WB          |
|          |                |                  | 1:500    | IP          |
| PEN2     | Cell Signaling | 8598             | 1:500    | WB          |
| APH1     | ThermoFisher   | PA1-2010         | 1:1000   | WB          |
|          |                |                  | 1:500    | IP          |
| NCT      | Santa Cruz     | Sc-376513        | 1:1000   | WB          |

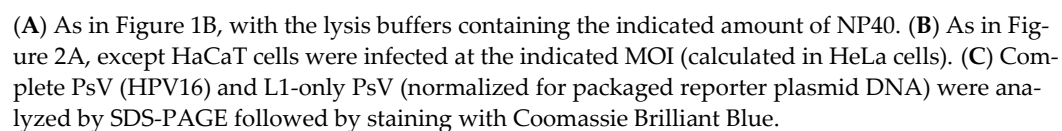

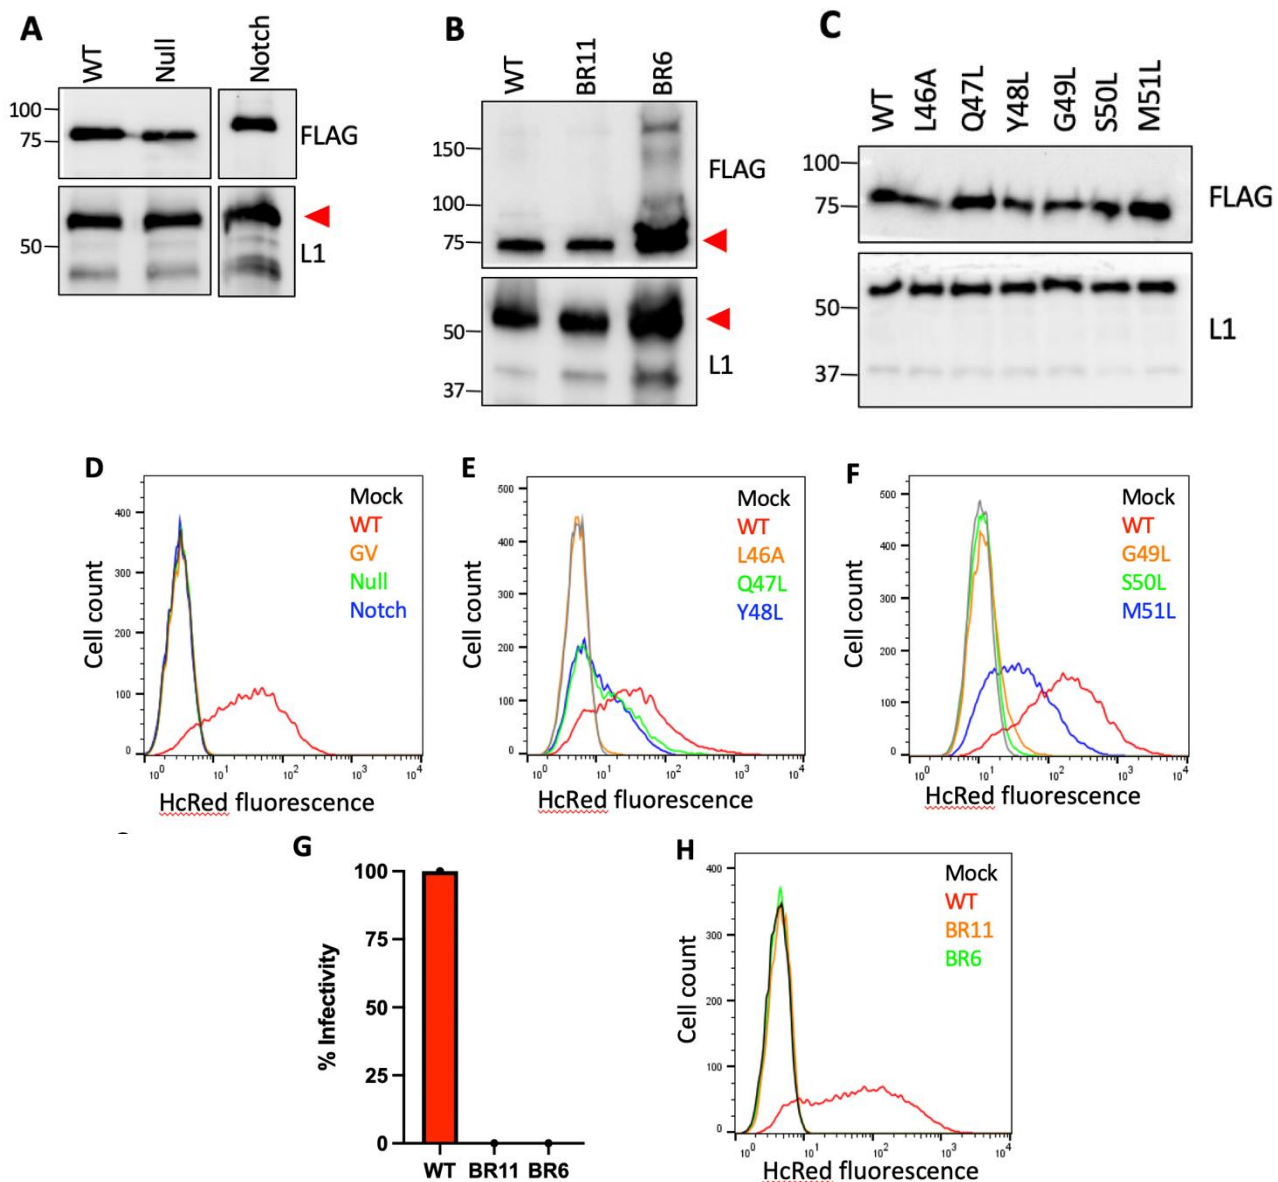

Figure S2. Related to figure 3.

(A) Normalized amounts of gradient-purified wild-type, L2 TM Null, and L2 TM Notch PsVs were analyzed by SDS-PAGE followed by western blotting for L1 or the FLAG tag on the C-terminus of HPV L2. Red arrowhead shows position of L1. All samples were analyzed on the same SDS-PAGE gel; an extraneous lane was removed between the Null and Notch mutants. (B) As in (A), except with the indicated TM mutants. Red arrowhead shows position of L1 and FLAG-tagged L2. (C) As in (A), except with the indicated TM point mutants. (D-F) Flow cytometry histograms of HcRed reporter gene expression used to generate the graphs shown in Figure 3C, 3D, and 3E, respectively. (G) Infection was analyzed as in Figure 3C for the indicated PsV. (H) Flow cytometry histograms are shown as in panel D-F.
